# Supplementary material for: Facile one-pot synthesis of Cu2ZnSnS4 quaternary nanoparticles using a microwave-assisted method
Source: Royal Society of Chemistry journal article supplement (doi:10.1039/c3ce41691g), 2013-01-01
Supplement: c3ce41691g.pdf [file c3ce41691g.pdf]

# Supporting information

## **Facile one-pot synthesis of $\text{Cu}_2\text{ZnSnS}_4$ quaternary nanoparticles with microwave-assisted method**

**Kuo-Chin Wang<sup>a</sup>, Peter Chen<sup>\*a, b, c</sup>, Chuan-Ming Tseng<sup>d</sup>**

<sup>a</sup>Department of Photonics

<sup>b</sup>Advanced Optoelectronic Technology Center (AOTC)

<sup>c</sup>Research Center for Energy Technology and Strategy (RCETS)

National Cheng Kung University, Tainan, Taiwan 701

<sup>d</sup>Institute of Physics, Academia Sinica, 115, Taipei, Taiwan

**Characterizations of the as-synthesized CZTS nanoparticles without annealing :**  
Microwave-assisted synthesized nanoparticles without annealing were subjected to the following analysis for their materials characterization. The structural properties of the materials were studied using X-ray diffraction method. The surface morphology of the annealed powder is observed using field emission scanning electron microscopy (FE-SEM). Raman spectroscopy was applied to scrutinize the characteristic vibrational bonding of the material.

### **A. Yield of the CZTS powder**

Collected CZTS materials in one batch is 0.146 g

$$\text{CZTS}_{\text{real}} (\text{g}) = 0.146 \text{ g} \quad \text{M. W of CZTS} = 439.4$$

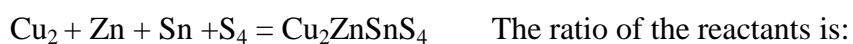

$$(\text{Cu}_2:\text{Zn}:\text{Sn}:\text{S}_4=0.75 \text{ mmol} : 0.375 \text{ mmol} : 0.375 \text{ mmol} : 2 \text{ mmol})$$

$$\text{CZTS}_{\text{theory}} (\text{g}) = 0.375 \times 10^{-3} \times 439.4=0.165 \text{ g}$$

$$\text{Yield} (\%) = 0.146 / 0.165 \approx 88\%$$

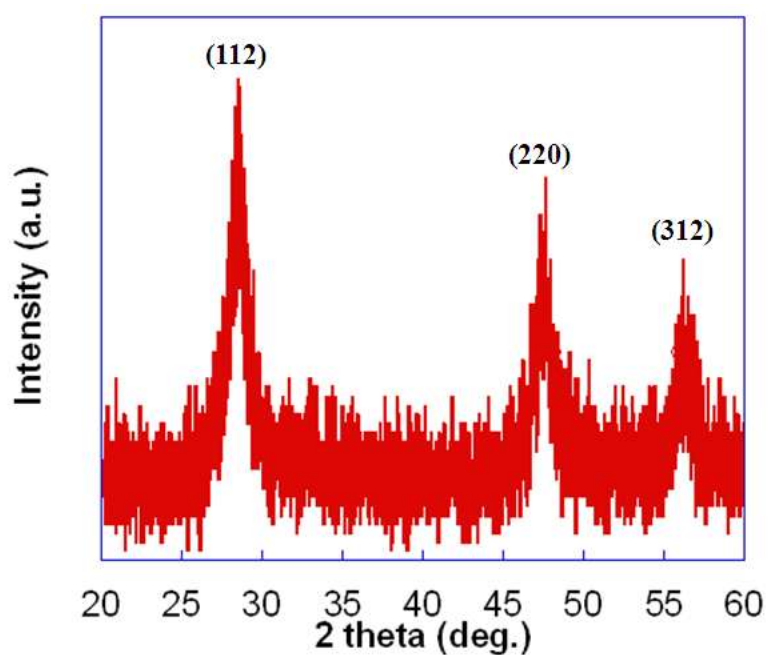

**Figure S1 .The XRD images of CZTS crystals as-synthesized after microwave reaction. (Without annealing)**

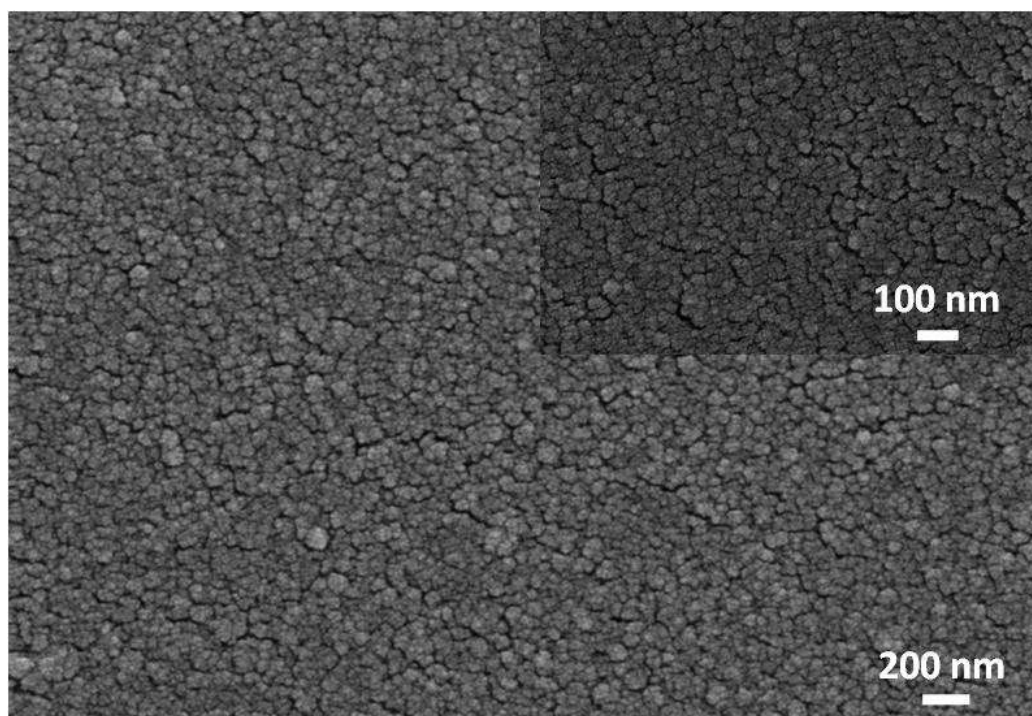

**Figure S2 .** The SEM images of CZTS crystals as-synthesized after microwave reaction.

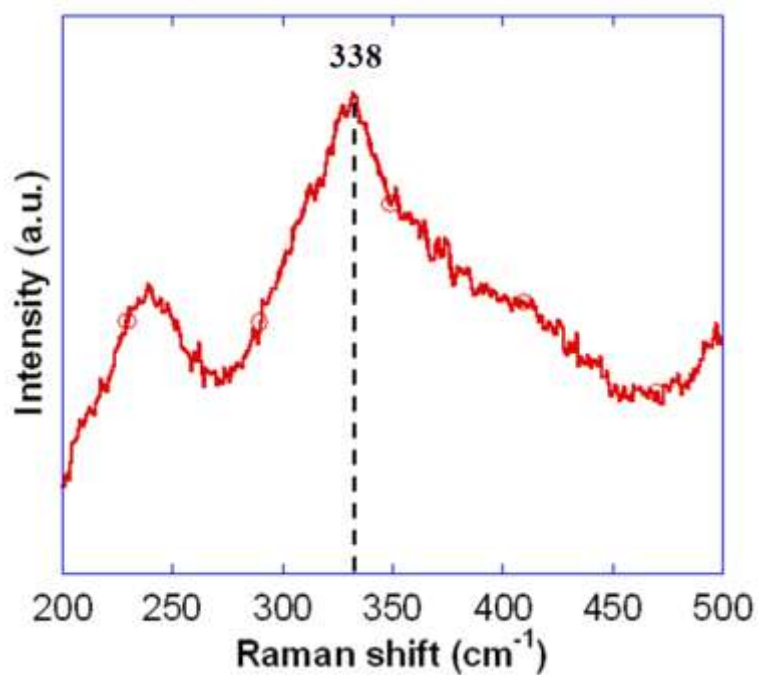

**Figure S3 .** The Raman images of CZTS crystals as-synthesized after microwave reaction.

### Particle size characterization by DLS.

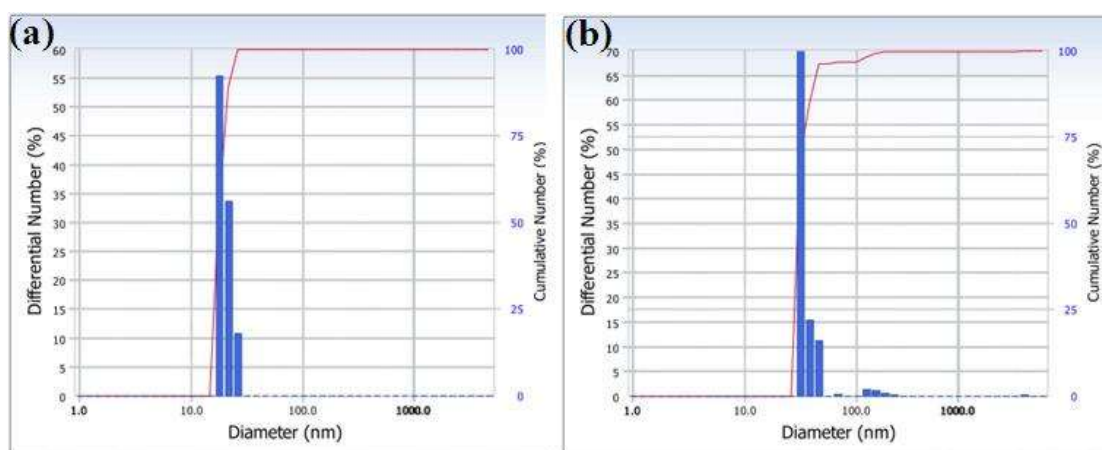

**Figure S4.** The size distributions of CZTS annealed (a) in glove box and (b) by sulfurization.

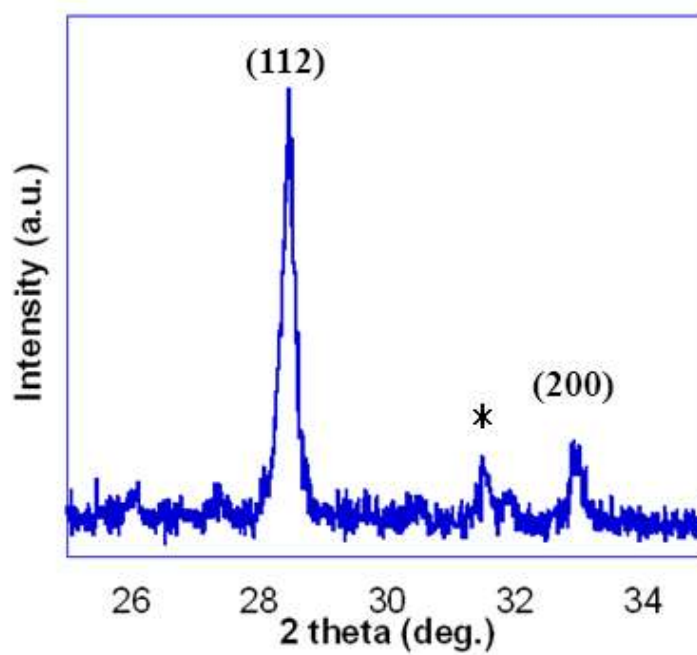

**Figure S5.** XRD pattern ranging from 25 to 35 degree of CZTS annealed in GB.

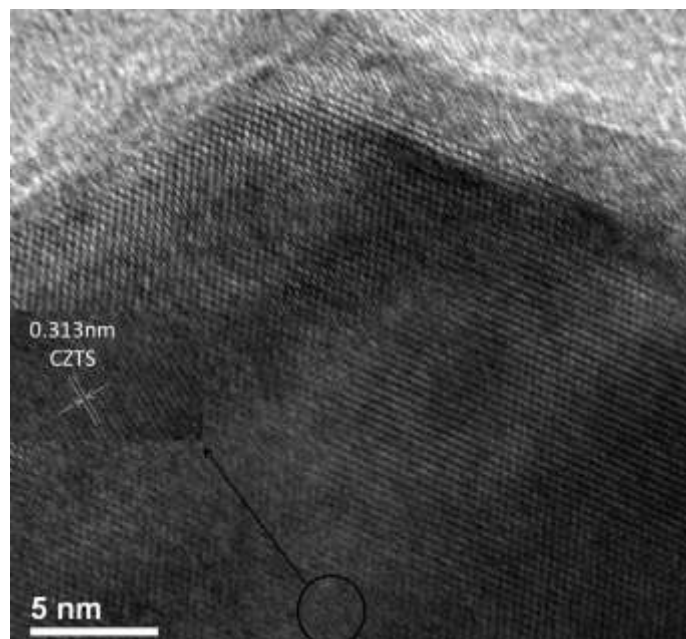

**Figure S6.** The high-resolution TEM image showing the lattice fringes of CZTS nanocrystal annealed in GB.
